# Supplementary material
Source: MDPI journal article supplement (https://www.mdpi.com/2073-4395/12/10/2316)
Supplement: s1 [file s1]

|                  | Dry weight | Root-shoot Ratio | Plant Height | Stem Length | Leave Area | Chl Content | Fv/Fm  | PI abs  | NBI    | Tr     | Pn     | CI     | GS    | Rubisco Activity | AhRBCS 1/5 | AhRBCS 2/6 |
|------------------|------------|------------------|--------------|-------------|------------|-------------|--------|---------|--------|--------|--------|--------|-------|------------------|------------|------------|
| Root-shoot Ratio | -0.19      |                  |              |             |            |             |        |         |        |        |        |        |       |                  |            |            |
| Plant Height     | 0.01       | 0.20             |              |             |            |             |        |         |        |        |        |        |       |                  |            |            |
| Stem Length      | 0.50*      | 0.20             | 0.61**       |             |            |             |        |         |        |        |        |        |       |                  |            |            |
| Leave Area       | 0.24       | 0.27             | 0.83**       | 0.78**      |            |             |        |         |        |        |        |        |       |                  |            |            |
| Chl Content      | 0.29       | -0.03            | -0.08        | 0.06        | -0.12      |             |        |         |        |        |        |        |       |                  |            |            |
| Fv/Fm            | -0.36      | -0.02            | 0.53**       | 0.21        | 0.20       | -0.01       |        |         |        |        |        |        |       |                  |            |            |
| PI abs           | -0.16      | 0.09             | 0.62**       | 0.35        | 0.42*      | 0.06        | 0.81** |         |        |        |        |        |       |                  |            |            |
| NBI              | -0.30      | 0.15             | 0.59**       | 0.25        | 0.37       | 0.13        | 0.61** | 0.67**  |        |        |        |        |       |                  |            |            |
| Tr               | 0.17       | -0.17            | -0.50**      | -0.31       | -0.51**    | 0.64**      | -0.31  | -0.41*  | -0.14  |        |        |        |       |                  |            |            |
| Pn               | 0.05       | -0.33            | -0.36        | -0.34       | -0.42*     | 0.61**      | -0.26  | -0.34   | -0.03  | 0.90** |        |        |       |                  |            |            |
| CI               | 0.27       | 0.11             | -0.08**      | -0.27       | -0.47*     | 0.34        | -0.39  | -0.47*  | -0.40* | 0.55** | 0.21   |        |       |                  |            |            |
| GS               | 0.17       | -0.23            | -0.51**      | -0.28       | -0.47*     | 0.65**      | -0.29  | -0.39   | -0.12  | 0.99** | 0.93** | 0.48*  |       |                  |            |            |
| Rubisco Activity | 0.54**     | -0.08            | 0.09         | 0.48*       | 0.01       | 0.20        | 0.06   | 0.12    | 0.01   | 0.05   | -0.01  | -0.02  | 0.05  |                  |            |            |
| AhRBCS 1/5       | -0.37      | 0.06             | -0.48*       | -0.60**     | -0.40*     | 0.07        | -0.46* | -0.53** | -0.39  | 0.24   | 0.29   | 0.27   | 0.25  | -0.68**          |            |            |
| AhRBCS 2/6       | -0.37      | -0.32            | -0.36        | -0.60**     | -0.41*     | -0.19       | -0.25  | -0.49*  | -0.48* | -0.01  | 0.14   | -0.06  | 0.02  | -0.51**          | 0.74**     |            |
| AhRBCS 3/4/7/8   | -0.02      | 0.10             | 0.38         | 0.51**      | 0.50*      | -0.26       | 0.19   | 0.37    | 0.47*  | -0.17  | -0.11  | -0.46* | -0.15 | 0.20             | -0.56**    | -0.55**    |

**Figure S1:** Correlation analysis based on data after 5 days of N- deficiency. From the brightest blue to the brightest red represented the greatest negative correlation and the greatest positive correlation respectively. *Chl* content chlorophyll content in seedling leaves; *Fv/Fm* PSII primary light energy conversion efficiency; *PIabs* performance index based on absorbed light energy; *NBI* nitrogen balance index; *Tr* transpiration rate; *Pn* net photosynthetic rate; *GS* stomatal conductance; *AhRBCS1/5* the expressions of AHRBCS1/5 in leaves; *AhRBCS2/6* the expressions of AhRBCS2/6 in leaves; *AhRBCS3/4/7/8* the expressions of AhRBCS3/4/7/8 in leaves. \*significant at  $p < 0.05$  level and \*\*significant at  $p < 0.01$  level..

|                  | Dry weight | Root-shoot Ratio | Plant Height | Stem Length | Leave Area | Chl Content | Fv/Fm   | PI abs  | NBI    | Tr     | Pn      | CI    | GS     | Rubisco Activity | AhRBCS 1/5 | AhRBCS 2/6 |
|------------------|------------|------------------|--------------|-------------|------------|-------------|---------|---------|--------|--------|---------|-------|--------|------------------|------------|------------|
| Root-shoot Ratio | 0.03       |                  |              |             |            |             |         |         |        |        |         |       |        |                  |            |            |
| Plant Height     | -0.02      | 0.18             |              |             |            |             |         |         |        |        |         |       |        |                  |            |            |
| Stem Length      | 0.26       | 0.10             | 0.26         |             |            |             |         |         |        |        |         |       |        |                  |            |            |
| Leave Area       | 0.44*      | 0.23             | 0.29         | 0.84**      |            |             |         |         |        |        |         |       |        |                  |            |            |
| Chl Content      | 0.49*      | -0.27            | -0.34        | 0.41*       | 0.28       |             |         |         |        |        |         |       |        |                  |            |            |
| Fv/Fm            | 0.10       | -0.39            | 0.12         | 0.36        | 0.30       | 0.38        |         |         |        |        |         |       |        |                  |            |            |
| PI abs           | 0.12       | -0.28            | 0.15         | 0.56**      | 0.46*      | 0.47*       | 0.86**  |         |        |        |         |       |        |                  |            |            |
| NBI              | -0.29      | -0.47*           | 0.16         | 0.13        | -0.03      | 0.20        | 0.49*   | 0.58**  |        |        |         |       |        |                  |            |            |
| Tr               | 0.33       | -0.52**          | -0.48*       | 0.22        | 0.08       | 0.76**      | 0.46*   | 0.54**  | 0.21   |        |         |       |        |                  |            |            |
| Pn               | 0.21       | -0.59**          | -0.45*       | 0.18        | 0.03       | 0.69**      | 0.52*   | 0.60**  | 0.38   | 0.94** |         |       |        |                  |            |            |
| CI               | 0.53**     | 0.11             | -0.06        | 0.31        | 0.38       | -0.02       | 0.00    | -0.28   | 0.23   | -0.04  |         |       |        |                  |            |            |
| GS               | 0.29       | -0.52**          | -0.51*       | 0.18        | 0.02       | 0.74**      | 0.44*   | 0.51*   | 0.20   | 1.00** | 0.93**  | 0.25  |        |                  |            |            |
| Rubisco Activity | 0.14       | -0.42*           | -0.45*       | 0.04        | 0.03       | 0.57**      | 0.07    | 0.19    | -0.01  | 0.71** | 0.69**  | -0.08 | 0.71** |                  |            |            |
| AhRBCS 1/5       | 0.03       | 0.47*            | 0.17         | 0.13        | 0.27       | -0.18       | -0.49*  | -0.34   | -0.35  | -0.46* | -0.63** | 0.51* | -0.45* | -0.27            |            |            |
| AhRBCS 2/6       | -0.22      | 0.33             | -0.11        | -0.26       | -0.06      | -0.33       | -0.73** | -0.53** | -0.31  | -0.39  | -0.41*  | -0.03 | -0.37  | 0.12             | 0.70**     |            |
| AhRBCS 3/4/7/8   | 0.24       | -0.57**          | -0.19        | 0.26        | 0.11       | 0.66**      | 0.56*   | 0.62**  | 0.59** | 0.74** | 0.83**  | -0.02 | 0.71** | 0.48*            | -0.64**    | -0.57**    |

**Figure S2:** Correlation analysis based on all data after 10 days of N-deficiency. From the brightest blue to the brightest red represented the greatest negative correlation and the greatest positive correlation respectively. *Chl* content chlorophyll content in seedling leaves; *Fv/Fm* PSII primary light energy conversion efficiency; *PIabs* performance index based on absorbed light energy; *NBI* nitrogen balance index; *Tr* transpiration rate; *Pn* net photosynthetic rate; *GS* stomatal conductance; *AhRBCS1/5* the expressions of AHRBCS1/5 in leaves; *AhRBCS2/6* the expressions of AhRBCS2/6 in leaves; *AhRBCS3/4/7/8* the expressions of AhRBCS3/4/7/8 in leaves. \*significant at  $p < 0.05$  level and \*\*significant at  $p < 0.01$  level.

|                  | Dry Weight | Root-shoot Ratio | Plant Height | Stem Length | Leave Area | Chl Content | Fv/Fm   | PI abs  | NBI     | Tr      | Pn      | CI    | GS      | Rubisco Activity | AhRBCS 1/5 | AhRBCS 2/6 |
|------------------|------------|------------------|--------------|-------------|------------|-------------|---------|---------|---------|---------|---------|-------|---------|------------------|------------|------------|
| Root-shoot Ratio | -0.34      |                  |              |             |            |             |         |         |         |         |         |       |         |                  |            |            |
| Plant Height     | 0.60**     | -0.47*           |              |             |            |             |         |         |         |         |         |       |         |                  |            |            |
| Stem Length      | 0.76**     | -0.46*           | 0.72**       |             |            |             |         |         |         |         |         |       |         |                  |            |            |
| Leave Area       | 0.78**     | -0.37            | 0.58**       | 0.89**      |            |             |         |         |         |         |         |       |         |                  |            |            |
| Chl Content      | 0.51*      | -0.29            | 0.16         | 0.60**      | 0.79**     |             |         |         |         |         |         |       |         |                  |            |            |
| Fv/Fm            | 0.38       | -0.09            | 0.11         | 0.51*       | 0.61**     | 0.82**      |         |         |         |         |         |       |         |                  |            |            |
| PI abs           | 0.44*      | -0.09            | 0.08         | 0.52**      | 0.72**     | 0.87**      | 0.77**  |         |         |         |         |       |         |                  |            |            |
| NBI              | 0.45*      | -0.15            | 0.23         | 0.55**      | 0.66**     | 0.61**      | 0.61**  | 0.82**  |         |         |         |       |         |                  |            |            |
| Tr               | 0.49*      | -0.02            | 0.15         | 0.47*       | 0.63**     | 0.70**      | 0.65**  | 0.83**  | 0.79**  |         |         |       |         |                  |            |            |
| Pn               | 0.60**     | -0.10            | 0.28         | 0.63**      | 0.78**     | 0.80**      | 0.73**  | 0.83**  | 0.74**  | 0.91**  |         |       |         |                  |            |            |
| CI               | -0.46*     | 0.11             | -0.46*       | -0.48*      | -0.46*     | -0.25       | -0.27   | -0.12   | -0.02   | -0.08   | -0.38   |       |         |                  |            |            |
| GS               | 0.52**     | -0.11            | 0.21         | 0.49*       | 0.67**     | 0.72**      | 0.63**  | 0.84**  | 0.78**  | 0.95**  | 0.88**  | -0.05 |         |                  |            |            |
| Rubisco Activity | 0.45*      | 0.12             | 0.00         | 0.40        | 0.60**     | 0.72**      | 0.64**  | 0.88**  | 0.76**  | 0.90**  | 0.79**  | -0.01 | 0.91**  |                  |            |            |
| AhRBCS 1/5       | -0.43*     | 0.17             | -0.26        | -0.61**     | -0.72**    | -0.85**     | -0.77** | -0.67** | -0.55** | -0.54** | -0.66** | 0.24  | -0.54** | -0.57**          |            |            |
| AhRBCS 2/6       | -0.16      | 0.32             | 0.09         | -0.34       | -0.46*     | -0.75**     | -0.64** | -0.61** | -0.51*  | -0.44*  | -0.42*  | -0.22 | -0.43*  | -0.49*           | 0.80**     |            |
| AhRBCS 3/4/7/8   | 0.29       | -0.06            | -0.03        | 0.42*       | 0.62**     | 0.78**      | 0.62**  | 0.81**  | 0.69**  | 0.67**  | 0.71**  | 0.05  | 0.68**  | 0.69**           | -0.72**    | -0.73**    |

**Figure S3:** Correlation analysis based on data after 15 days of N-deficiency. From the brightest blue to the brightest red represented the greatest negative correlation and the greatest positive correlation respectively. Chl content chlorophyll content in seedling leaves; Fv/Fm PSII primary light energy conversion efficiency; PIabs performance index based on absorbed light energy; NBI nitrogen balance index; Tr transpiration rate; Pn net photosynthetic rate; Gs stomatal conductance; *AhRBCS1/5* the expressions of *AhRBCS1/5* in leaves; *AhRBCS2/6* the expressions of *AhRBCS2/6* in leaves; *AhRBCS3/4/7/8* the expressions of *AhRBCS3/4/7/8* in leaves. \*significant at  $p < 0.05$  level and \*\*significant at  $p < 0.01$  level.

|                | Rubisco Activity | AhRBCS 1/5 | AhRBCS 2/6 |
|----------------|------------------|------------|------------|
| AhRBCS 1/5     | -0.28            |            |            |
| AhRBCS 2/6     | -0.23            | 0.93**     |            |
| AhRBCS 3/4/7/8 | 0.16             | -0.48*     | -0.53*     |
| <b>YH1</b>     |                  |            |            |
|                | Rubisco Activity | AhRBCS 1/5 | AhRBCS 2/6 |
| AhRBCS 1/5     | -0.19            |            |            |
| AhRBCS 2/6     | -0.19            | 0.76**     |            |
| AhRBCS 3/4/7/8 | 0.35             | -0.62**    | -0.73**    |
| <b>AH3</b>     |                  |            |            |
|                | Rubisco Activity | AhRBCS 1/5 | AhRBCS 2/6 |
| AhRBCS 1/5     | -0.34            |            |            |
| AhRBCS 2/6     | -0.37            | 0.55*      |            |
| AhRBCS 3/4/7/8 | 0.46*            | -0.63**    | -0.87**    |
| <b>PK18</b>    |                  |            |            |
|                | Rubisco Activity | AhRBCS 1/5 | AhRBCS 2/6 |
| AhRBCS 1/5     | -0.17            |            |            |
| AhRBCS 2/6     | -0.19            | 0.98**     |            |
| AhRBCS 3/4/7/8 | 0.36             | -0.54*     | -0.56*     |
| <b>LH4087</b>  |                  |            |            |

**Figure S4:** Correlation analysis based on expressions of *AhRBCSs* by N-deficiency. *AhRBCS1/5* the expressions of *AhRBCS1/5* in leaves; *AhRBCS2/6* the expressions of *AhRBCS2/6* in leaves; *AhRBCS3/4/7/8* the expressions of *AhRBCS3/4/7/8* in leaves. \*significant at  $p < 0.05$  level and \*\*significant at  $p < 0.01$  level.
