# Supplementary material
Source: MDPI journal article supplement (https://www.mdpi.com/2073-4395/12/10/2316)
Supplement: s1 [file s1]

Archive with 5 entries (5 files):
- agronomy-1937453-supplementary.pdf
- Figure.S1.jpg
- Figure.S2.jpg
- Figure.S3.jpg
- Figure.S4.jpg
