# Supplementary material
Source: MDPI journal article supplement (https://www.mdpi.com/2073-4395/12/10/2316)

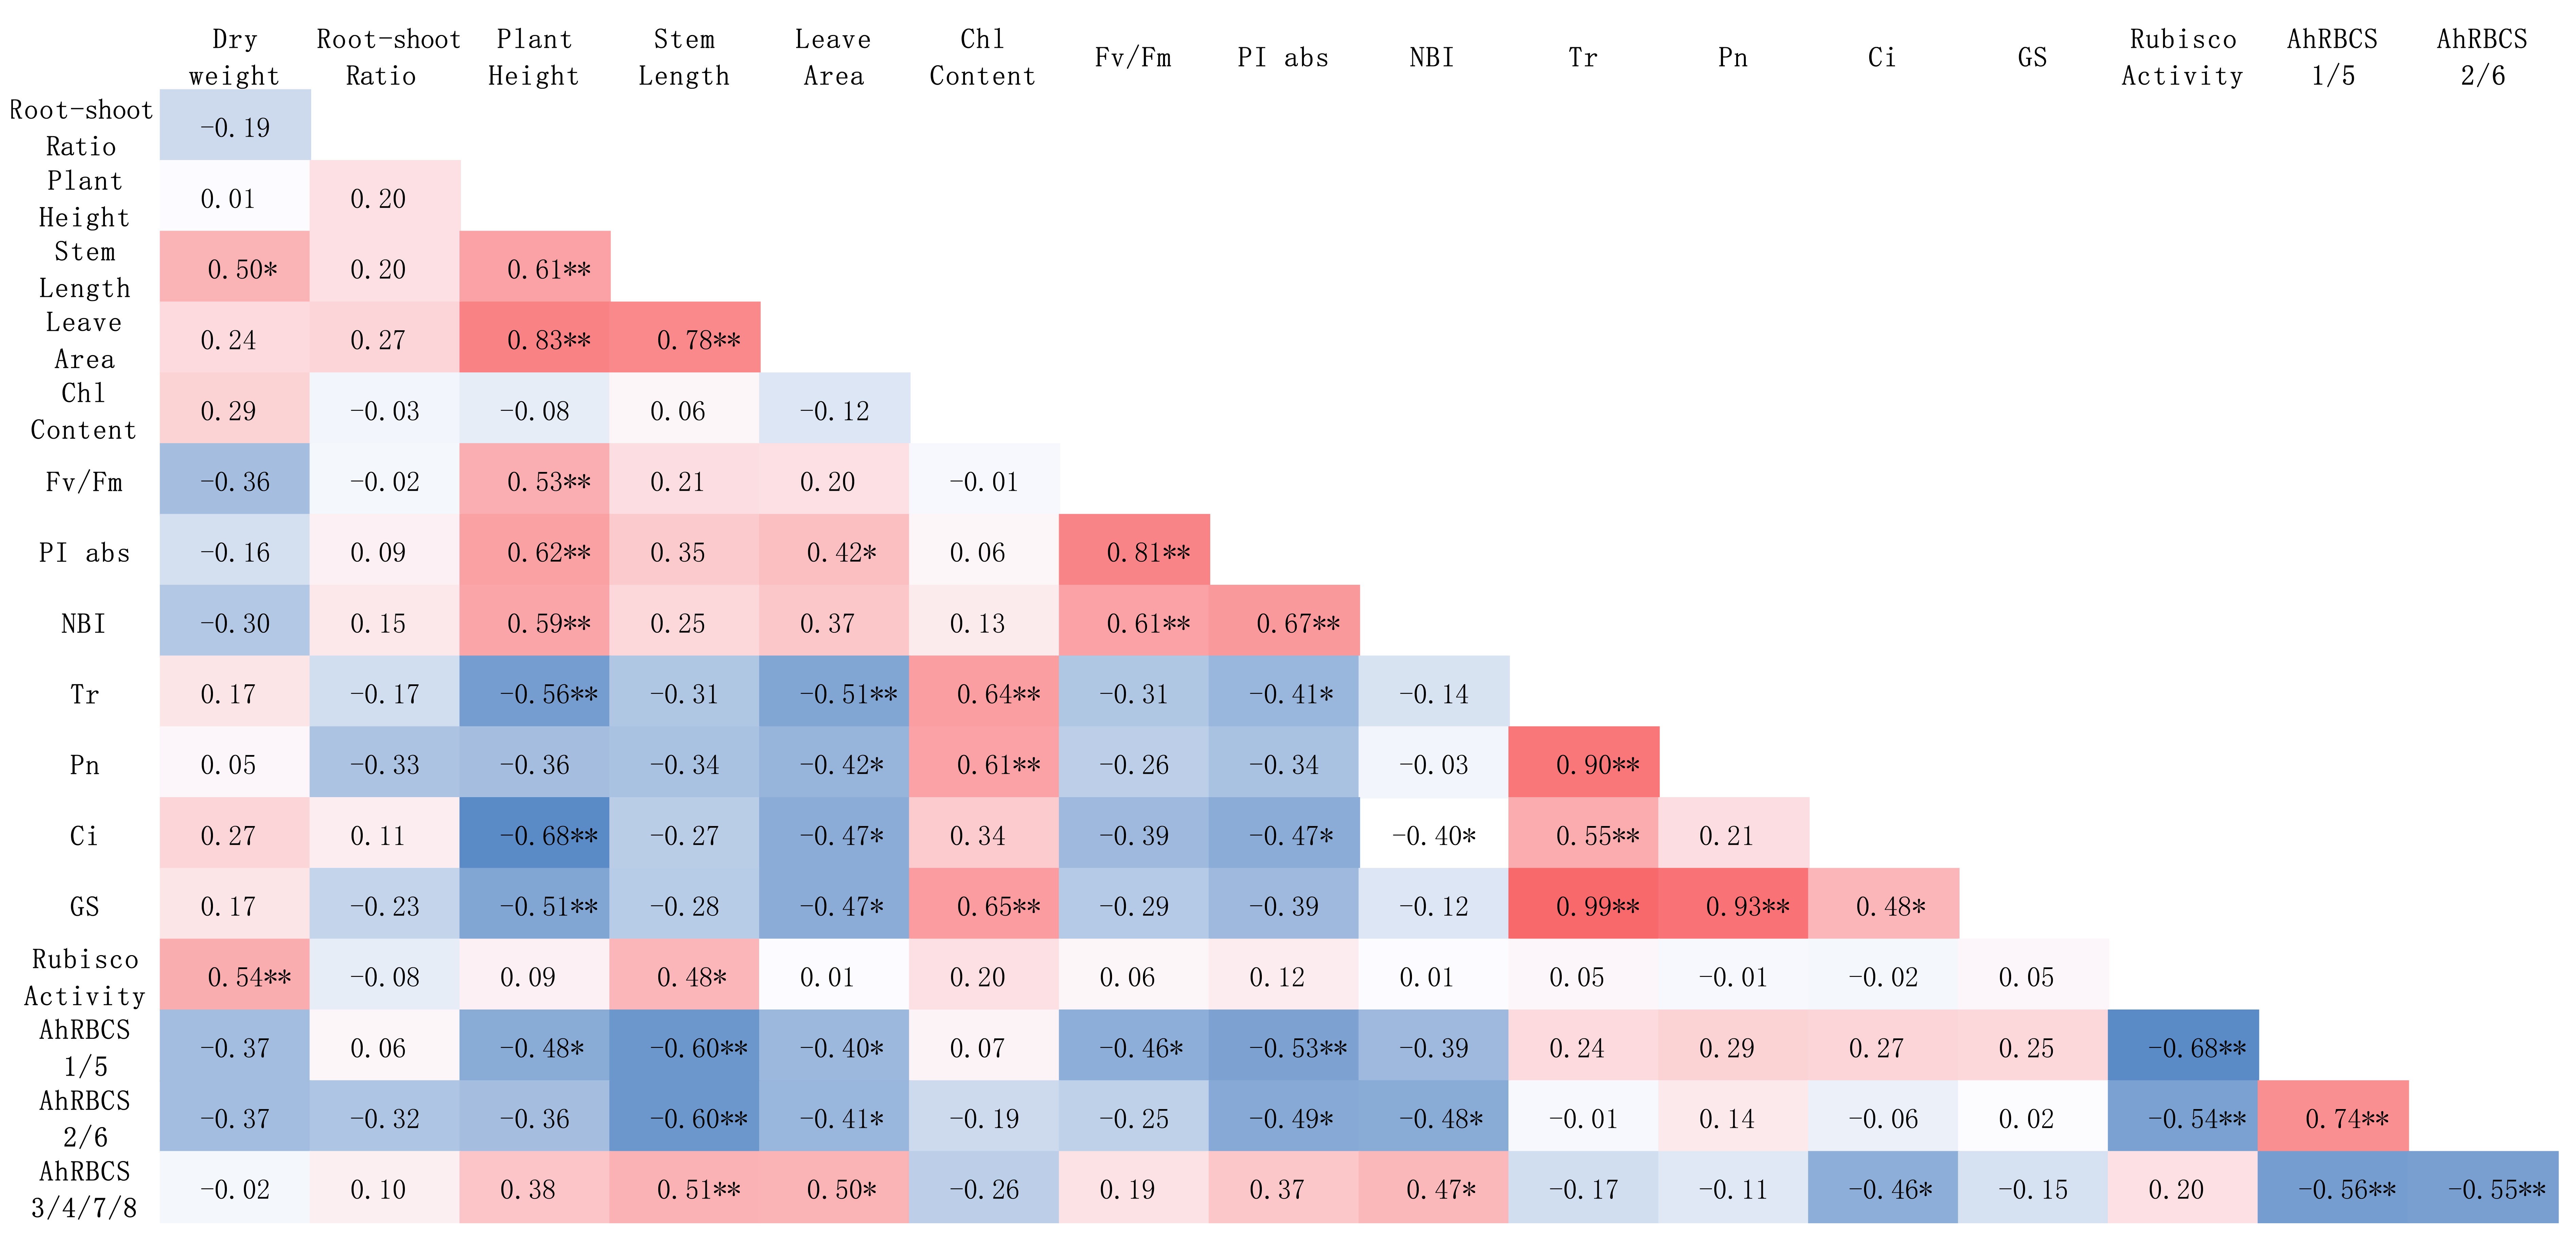

Supplement: s1 [file s1 › Figure.S1.jpg]

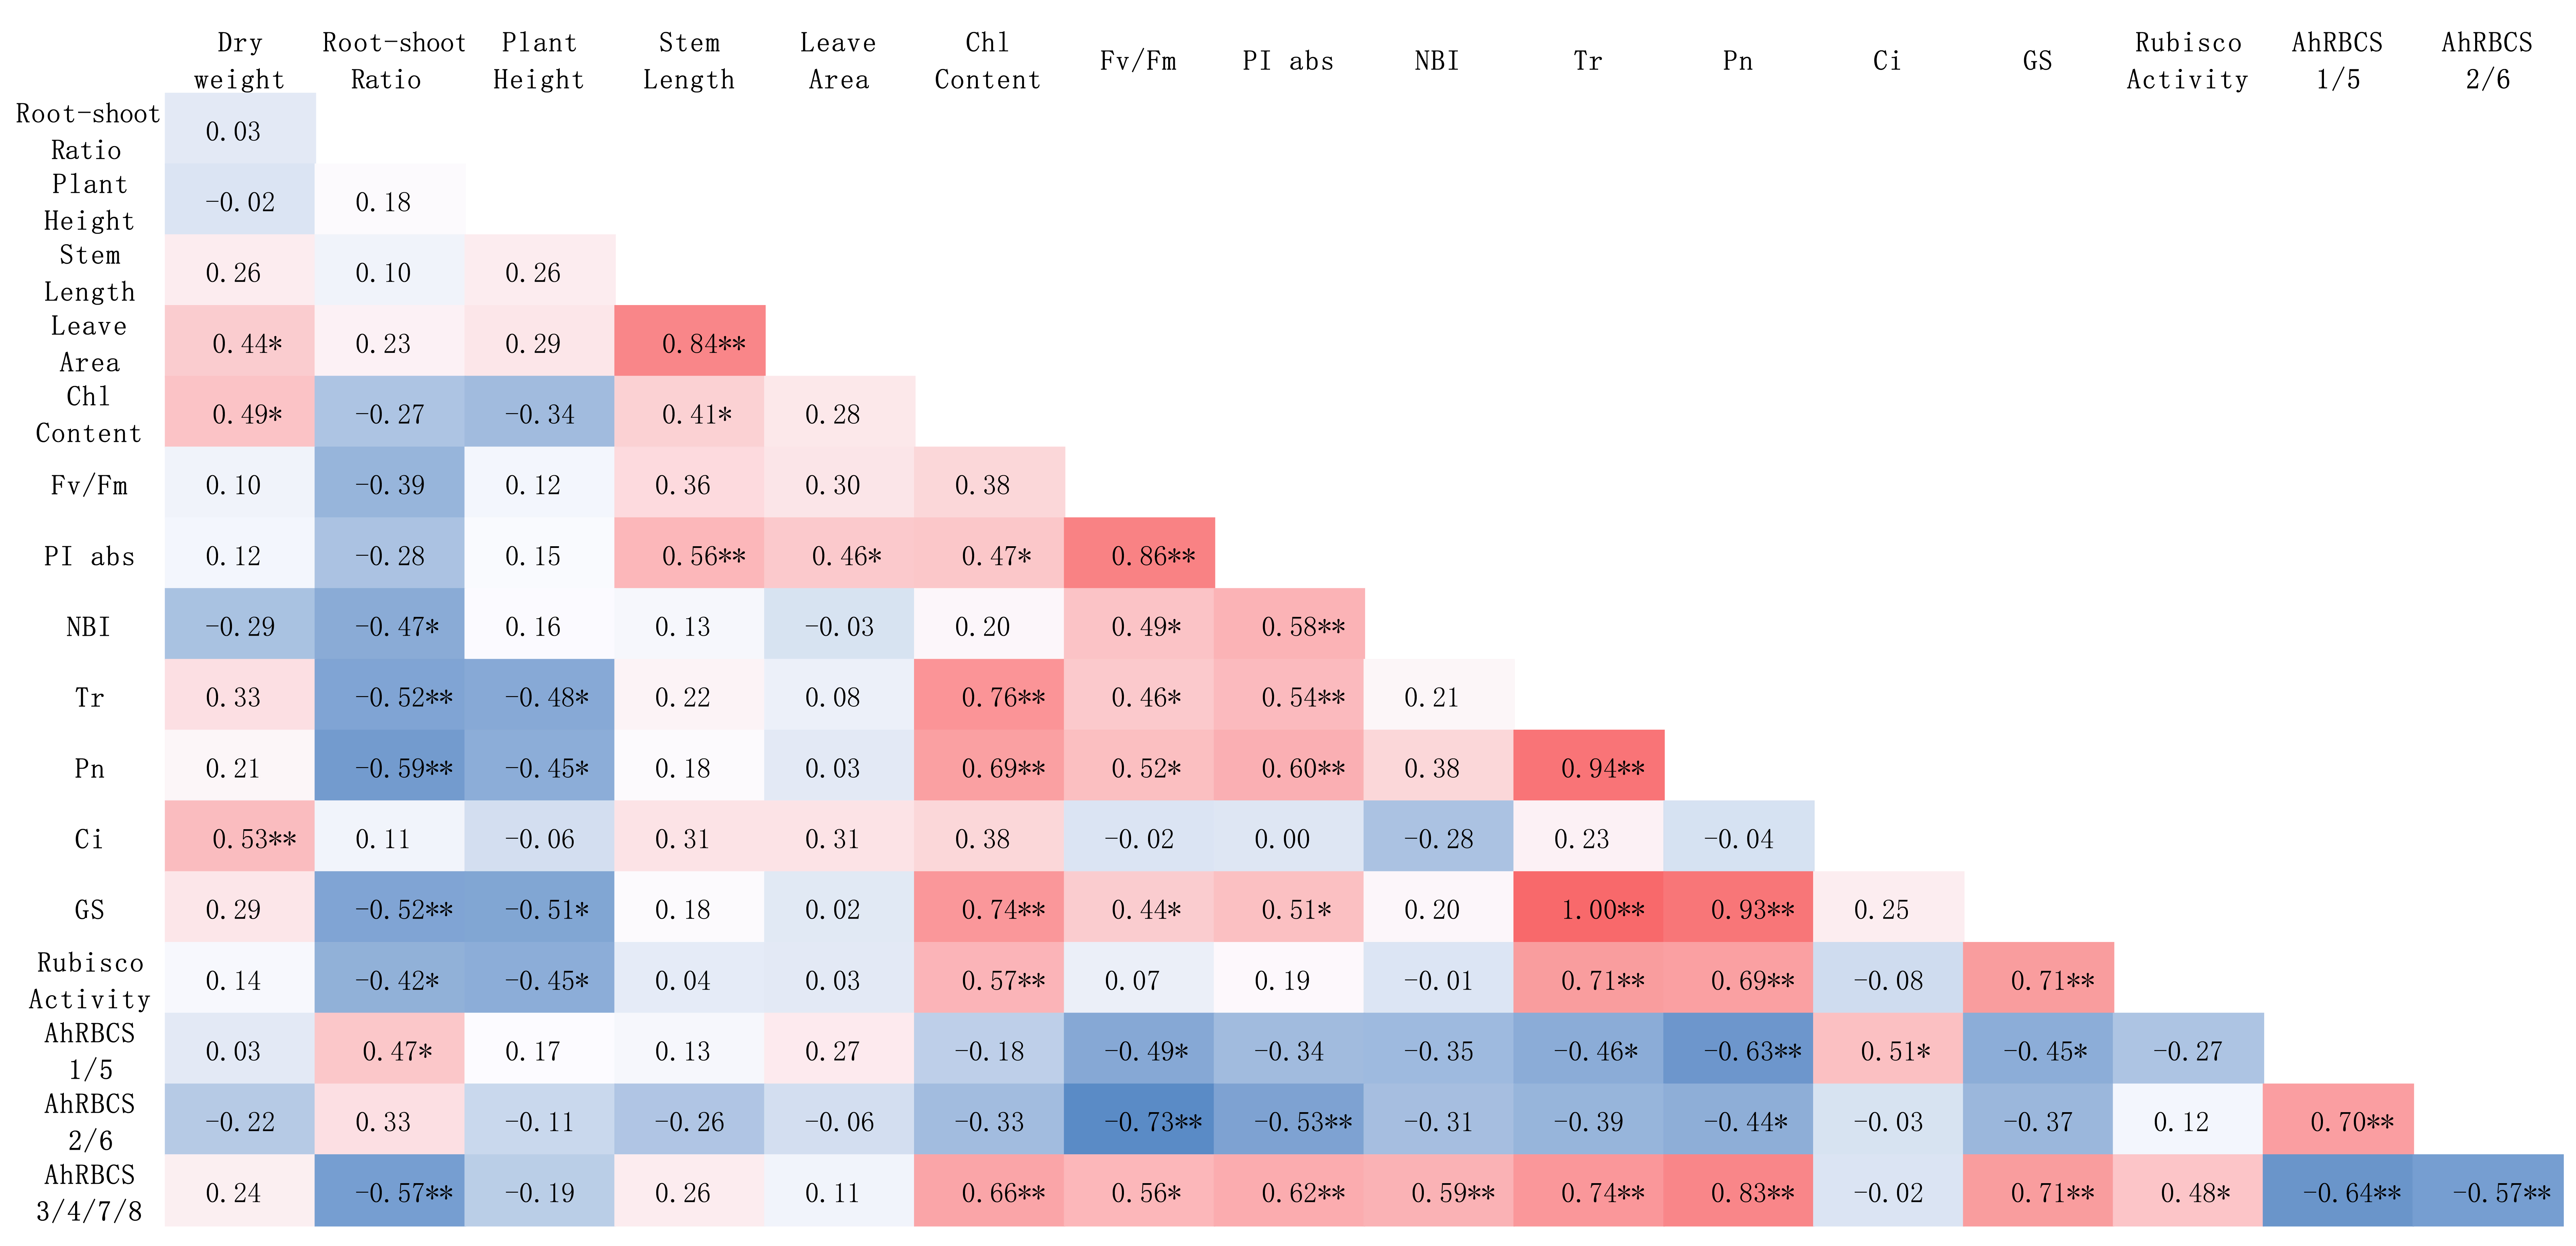

Supplement: s1 [file s1 › Figure.S2.jpg]

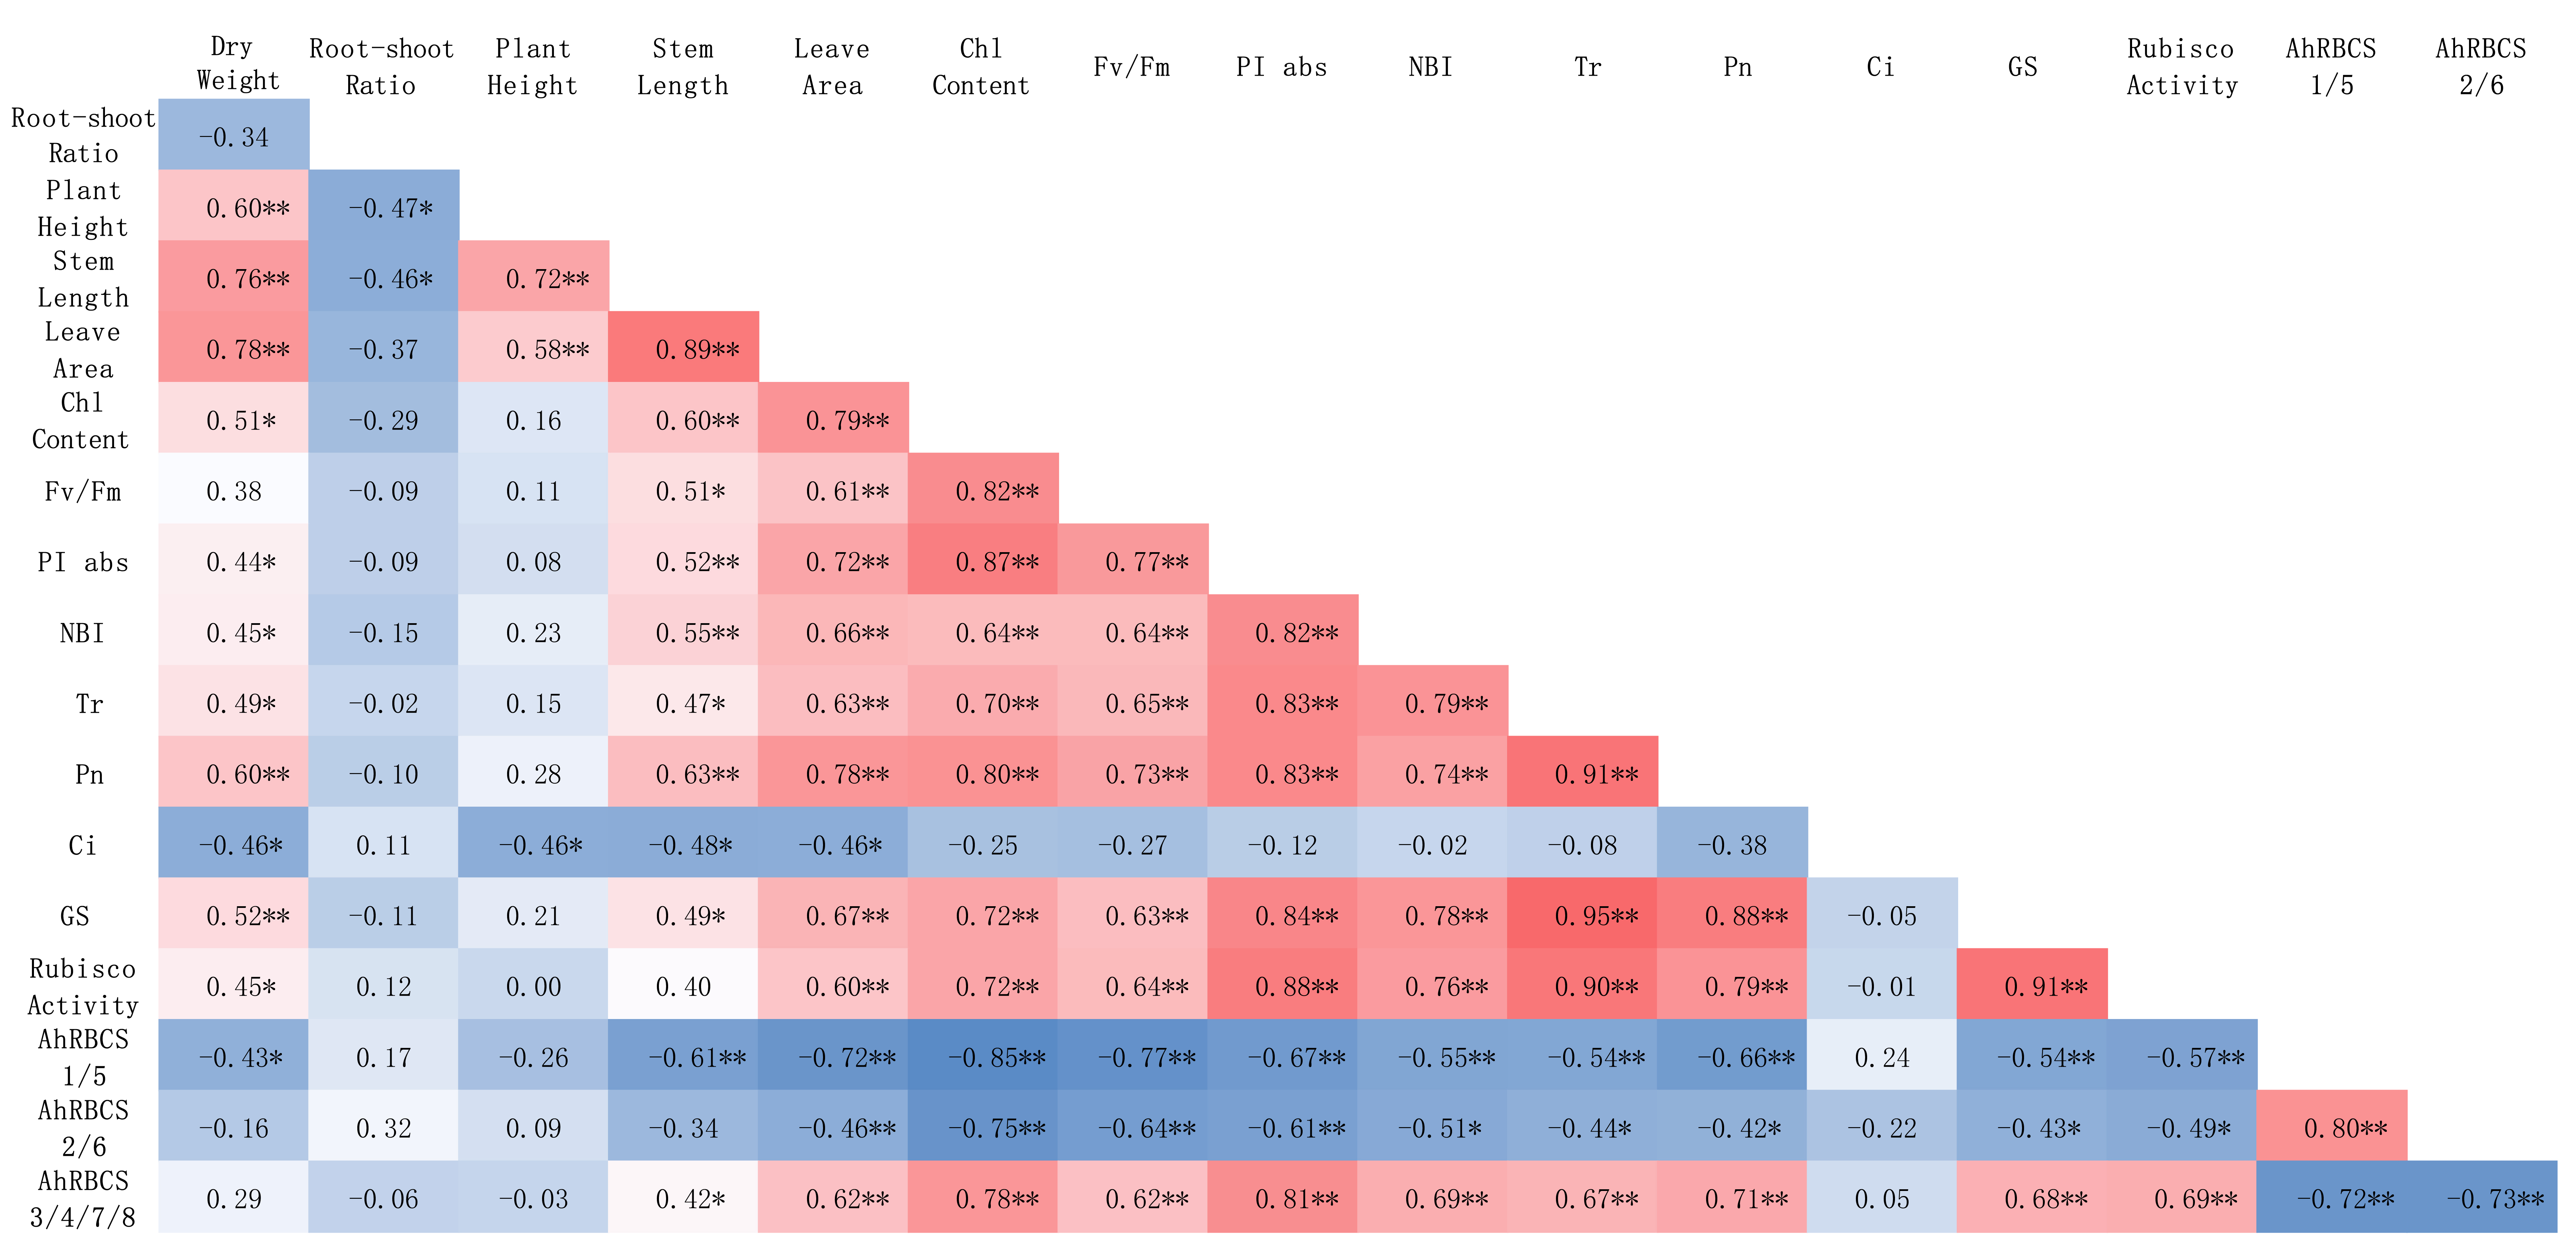

Supplement: s1 [file s1 › Figure.S3.jpg]

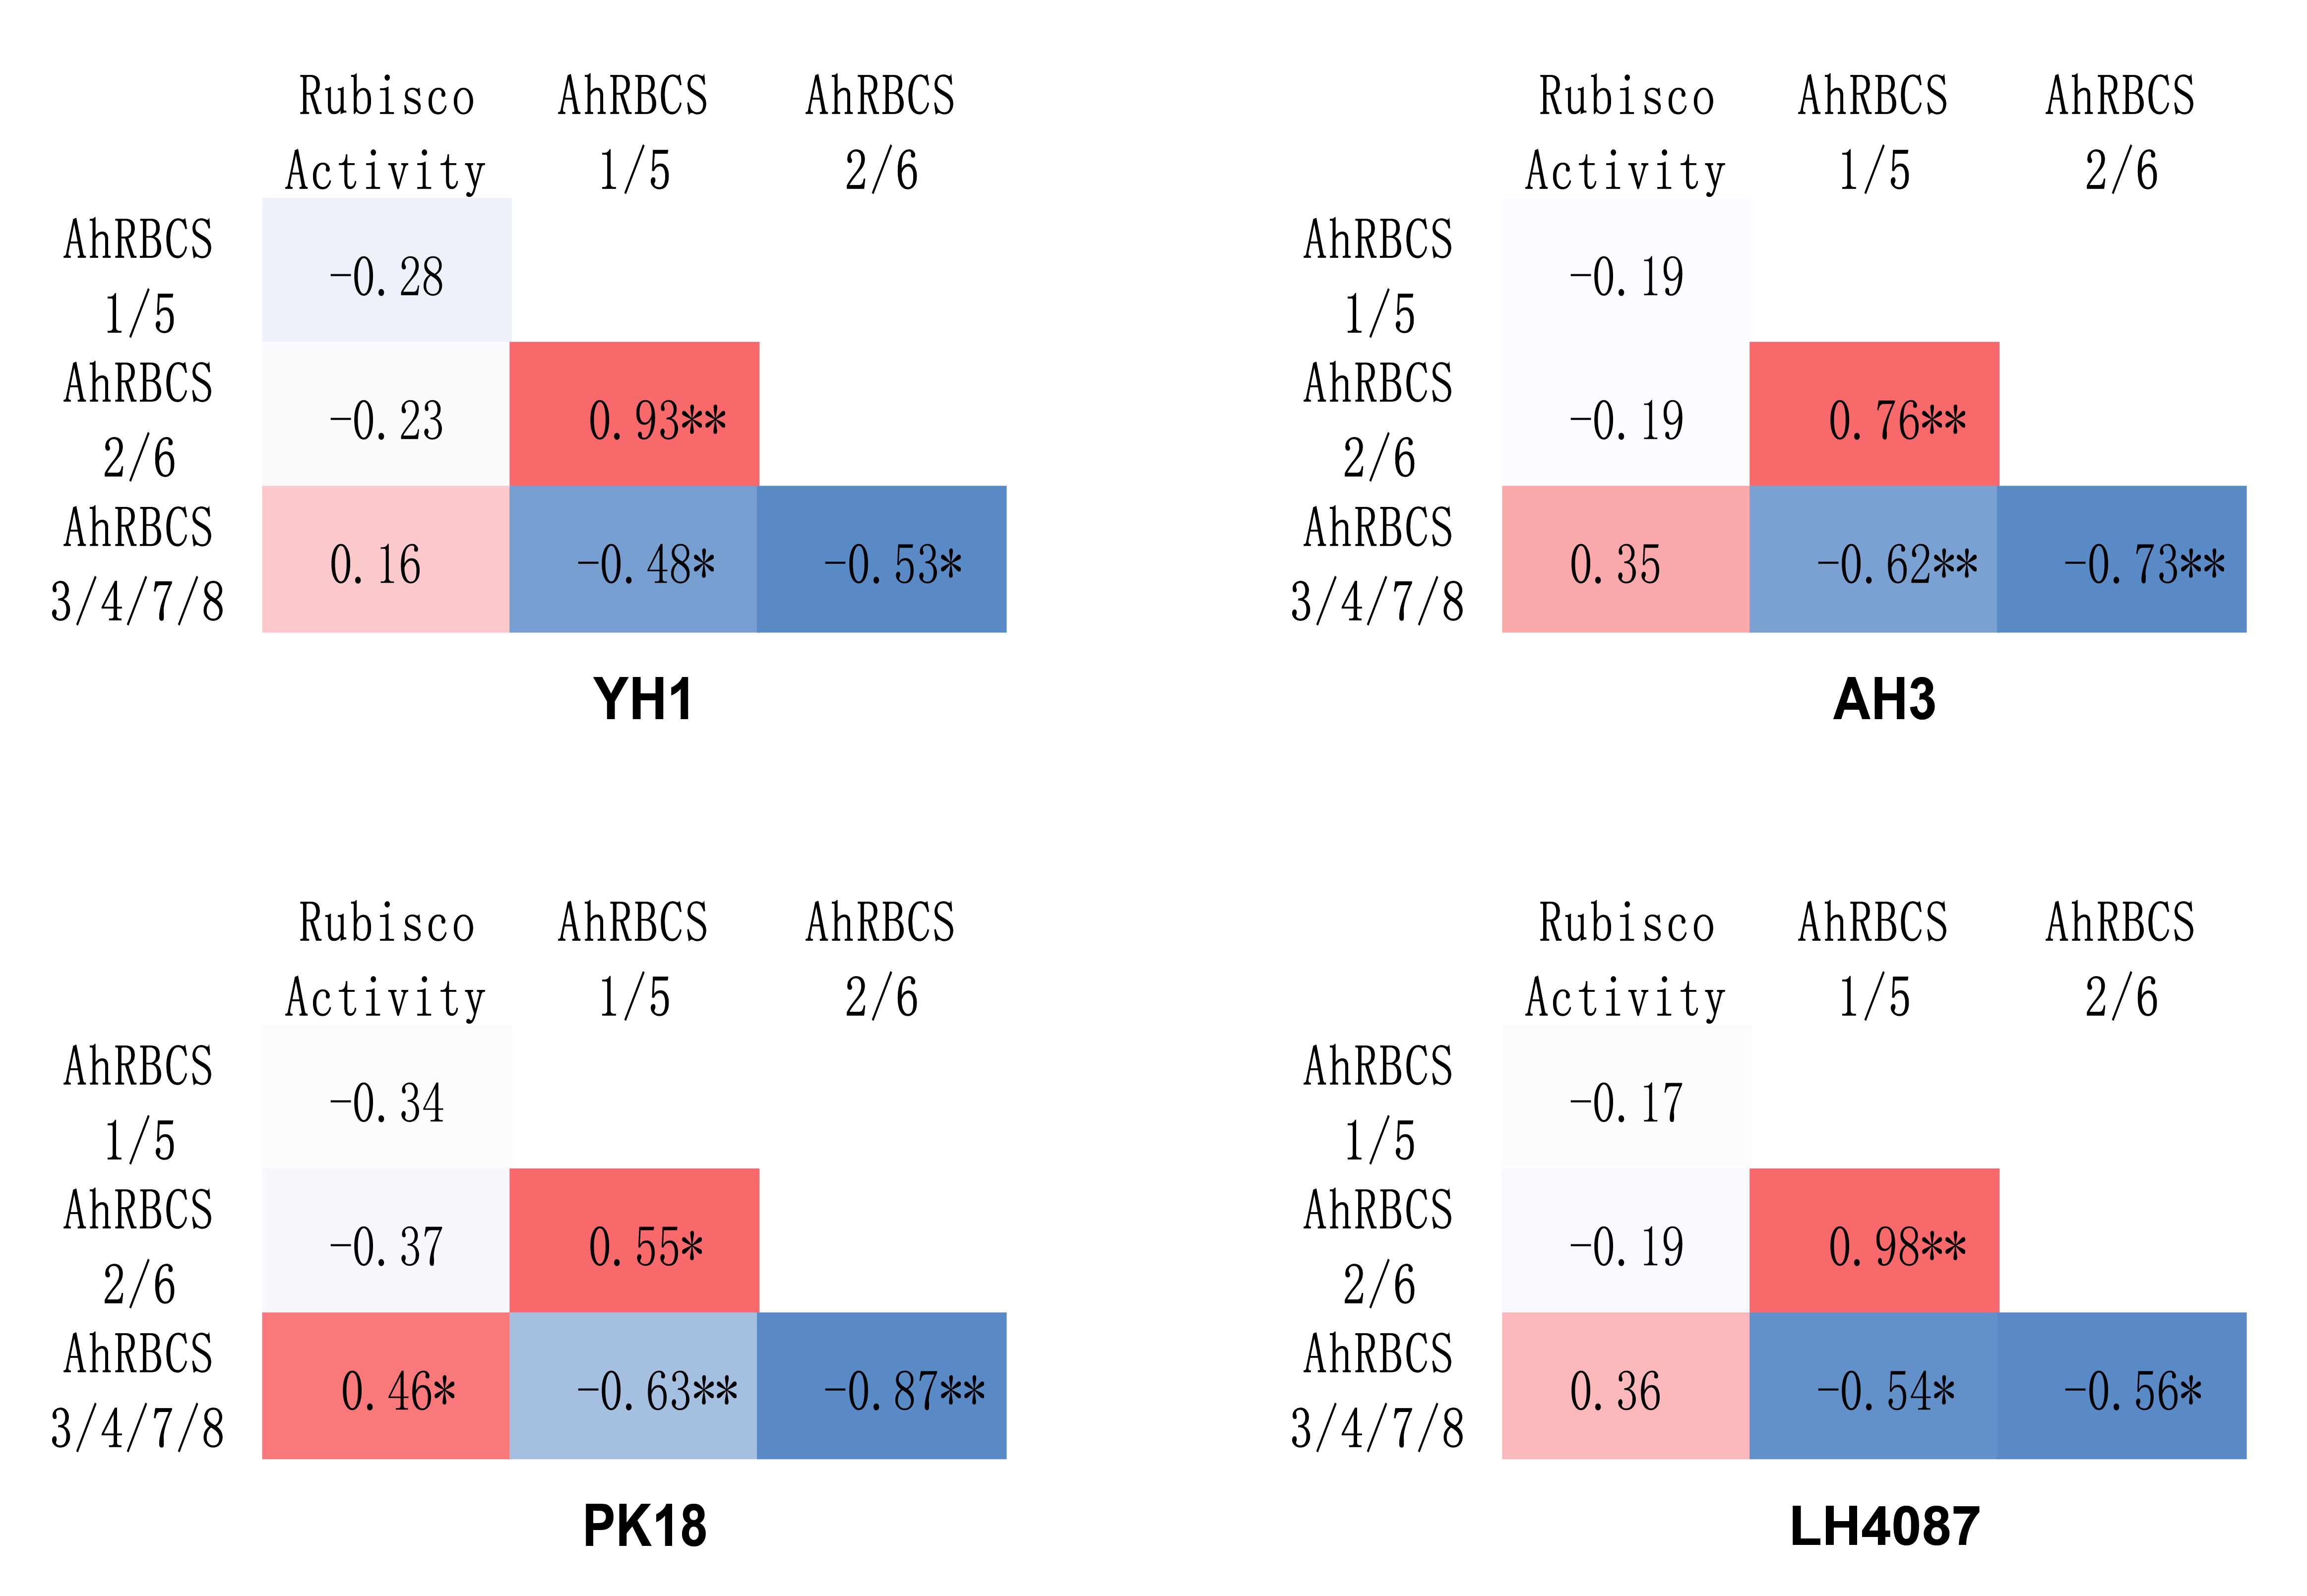

Supplement: s1 [file s1 › Figure.S4.jpg]
